# Supplementary material for: A Critical Analysis of the Quantum Nonlocality Problem
Source: Preprints.org preprint supplement (doi:10.20944/preprints202205.0015.v1), 2022-05-05
Supplement: Supplementary file 1 [file supplementary]

@Inbook{pPit89,
author="Pitowsky, Itamar",
editor="Kafatos, Menas",
title="From George Boole To John Bell --- The Origins of Bell's Inequality",
bookTitle="Bell's Theorem, Quantum Theory and Conceptions of the Universe",
year="1989",
publisher="Springer Netherlands",
address="Dordrecht",
pages="37--49",
isbn="978-94-017-0849-4",
doi="10.1007/978-94-017-0849-4_6"
}
@inbook{pPoi14,
place={Cambridge},
series={Cambridge Library Collection - History of Science},
title={The Measure of Time},
DOI={10.1017/CBO9781107252950.020},
booktitle={The Foundations of Science: Science and Hypothesis, The Value of Science, Science and Method},
publisher={Cambridge University Press},
author={Poincar\'{e}, Henri and Royce, Josiah},
editor={Halsted, George BruceTranslator},
year={2014},
pages={223--234},
collection={Cambridge Library Collection - History of Science}
}
@inbook{bBac09,
place={Cambridge},
title={Locality and incompleteness},
booktitle={Quantum Theory at the Crossroads: Reconsidering the 1927 Solvay Conference},
publisher={Cambridge University Press},
author={Bacciagaluppi, Guido and Valentini, Antony},
year={2009},
pages={175--183},
DOI={10.1017/CBO9781139194983.008}
}
@incollection{bVai09,
author="Vaidman, Lev",
title="Counterfactuals in Quantum Mechanics",
editor="Greenberger, Danieland Hentschel, Klausand Weinert, Friedel",
bookTitle="Compendium of Quantum Physics",
publisher="Springer Berlin Heidelberg",
address="Berlin, Heidelberg",
year="2009",
pages="132--136",
}
%se reemplaz� por el de arriva. Este se baj� de la propia referencia pero es mejor el otro.
%@Inbook{bVai09_aux,
%author="Vaidman, Lev",
%editor="Greenberger, Danieland Hentschel, Klausand Weinert, Friedel",
%title="Counterfactuals in Quantum Mechanics",
%bookTitle="Compendium of Quantum Physics",
%year="2009",
%publisher="Springer Berlin Heidelberg",
%address="Berlin, Heidelberg",
%pages="132--136",
%isbn="978-3-540-70626-7",
%doi="10.1007/978-3-540-70626-7_40",
%url="https://doi.org/10.1007/978-3-540-70626-7_40"
%}
@InCollection{RPCC,
	author       =	{Hitchcock, Christopher and R\'{e}dei, Mikl\'{o}s},
	title        =	{{Reichenbach's Common Cause Principle}},
	booktitle    =	{The {Stanford} Encyclopedia of Philosophy},
	editor       =	{Edward N. Zalta},
	howpublished =	{\url{https://plato.stanford.edu/archives/spr2020/entries/physics-Rpcc/}},
	year         =	{2020},
	edition      =	{Spring 2020},
	publisher    =	{Metaphysics Research Lab, Stanford University},
    address      =  {{}}
}
@misc{iLam18,
    title = "Can {B}ell's {T}heorem {B}e {D}isproved? --- {SCIENCE TRENDS}",
    author="Lambare, J. P.",
    year = "2018",
    url= "https://sciencetrends.com/can-bells-theorem-disproved/",
    note = "[Online; accessed 22-July-2021]"
}
@misc{wiki:cfd,
    title = "Counterfactual definiteness --- {Wikipedia}{,} The Free Encyclopedia",
    author = "{Wikipedia contributors}",
    year = "2020",
    url = "https://en.wikipedia.org/w/index.php?title=Counterfactual_definiteness&oldid=988132575",
    note = "[Online; accessed 3-January-2021]"
}
@article{pBru14,
  title = {Bell nonlocality},
  author = {Brunner, Nicolas and Cavalcanti, Daniel and Pironio, Stefano and Scarani, Valerio and Wehner, Stephanie},
  journal = {Rev. Mod. Phys.},
  volume = {86},
  issue = {2},
  pages = {419--478},
  numpages = {60},
  year = {2014},
  month = {Apr},
  publisher = {American Physical Society},
  doi = {10.1103/RevModPhys.86.419}
}
@article{pWhi84,
author = {Whitaker,Andrew },
title = {{RICHARD FEYNMAN AND {B}ELL'S THEOREM}},
journal = {American Journal of Physics},
volume = {84},
number = {7},
pages = {493-494},
year = {2016},
doi = {10.1119/1.4948268}
}
@article{Ram21,
	author={Ramanathan, Ravishankar and Liu, Yuan and Horodecki, Pawel},
	title={Large violations in {K}ochen {S}pecker contextuality and their applications},
	journal={New Journal of Physics},
	year={2021},
    doi={10.1088/1367-2630/ac3a84}
}
@article{pWoo15,
	title = {The lesson of causal discovery algorithms for quantum correlations: causal explanations of {B}ell-inequality violations require fine-tuning},
	author = {Christopher J Wood and Robert W Spekkens},
	year = 2015,
	month = {mar},
	publisher = {{IOP} Publishing},
	volume = {17},
	number = {3},
	pages = {033002},
	journal = {New Journal of Physics},
	doi = {10.1088/1367-2630/17/3/033002},
	url = {https://doi.org/10.1088/1367-2630/17/3/033002}
}
@article{pCav14,
	author = {Eric G Cavalcanti and Raymond Lal},
	title = {On modifications of {R}eichenbach's principle of common cause in light of {B}ell's theorem},
	journal = {Journal of Physics A: Mathematical and Theoretical},
	year = 2014,
	month = {oct},
	publisher = {{IOP} Publishing},
	volume = {47},
	number = {42},
	pages = {424018},
	doi = {10.1088/1751-8113/47/42/424018},
	url = {https://doi.org/10.1088/1751-8113/47/42/424018},
}
@article{pCav18,
  title = {Classical {C}ausal {M}odels for {B}ell and {K}ochen-{S}pecker {I}nequality {V}iolations {R}equire {F}ine-{T}uning},
  author = {Cavalcanti, Eric G.},
  journal = {Phys. Rev. X},
  volume = {8},
  issue = {2},
  pages = {021018},
  numpages = {9},
  year = {2018},
  month = {Apr},
  publisher = {American Physical Society},
  doi = {10.1103/PhysRevX.8.021018},
  url = {https://link.aps.org/doi/10.1103/PhysRevX.8.021018}
}
@article{pHos20,
AUTHOR={Hossenfelder, Sabine and Palmer, Tim},
TITLE={Rethinking Superdeterminism},
JOURNAL={Frontiers in Physics},
VOLUME={8},
PAGES={139},
YEAR={2020},
URL={https://www.frontiersin.org/article/10.3389/fphy.2020.00139},
DOI={10.3389/fphy.2020.00139},
ISSN={2296-424X}
}
@article{pBohm57,
  title = {Discussion of {E}xperimental {P}roof for the {P}aradox of {E}instein, {R}osen, and {P}odolsky},
  author = {Bohm, D. and Aharonov, Y.},
  journal = {Phys. Rev.},
  volume = {108},
  issue = {4},
  pages = {1070--1076},
  numpages = {0},
  year = {1957},
  month = {Nov},
  publisher = {American Physical Society},
  doi = {10.1103/PhysRev.108.1070},
  url = {https://link.aps.org/doi/10.1103/PhysRev.108.1070}
}
@article{pNis14,
  title = {Non {L}ocality {P}roofs in {Q}uantum {M}echanics {A}nalyzed by {O}rdinary {M}athematical {L}ogic},
  author = {Nistic\`{o}, Giuseppe},
  journal = { Int J Theor Phys},
  volume = {53},
  issue = {},
  pages = {3475--3487},
  numpages = {},
  year = {2014},
  month = {},
  publisher = {},
  doi = {10.1007/s10773-013-1822-x}
}
@article{Sch11,
title = {A snapshot of foundational attitudes toward quantum mechanics},
journal = {Studies in History and Philosophy of Science Part B: Studies in History and Philosophy of Modern Physics},
volume = {44},
number = {3},
pages = {222-230},
year = {2013},
issn = {1355-2198},
doi = {https://doi.org/10.1016/j.shpsb.2013.04.004},
url = {https://www.sciencedirect.com/science/article/pii/S1355219813000397},
author = {Maximilian Schlosshauer and Johannes Kofler and Anton Zeilinger}
}
@article{pAbr11,
	title = {The sheaf-theoretic structure of non-locality and contextuality},
	author = {Samson Abramsky and Adam Brandenburger},
	year = 2011,
	month = {nov},
	publisher = {{IOP} Publishing},
	volume = {13},
	number = {11},
	pages = {113036},
    doi   ={10.1088/1367-2630/13/11/113036}
}
@article{pLiu16,
  title = {Nonlocality from Local Contextuality},
  author = {Liu, Bi-Heng and Hu, Xiao-Min and Chen, Jiang-Shan and Huang, Yun-Feng and Han, Yong-Jian and Li, Chuan-Feng and Guo, Guang-Can and Cabello, Ad\'an},
  journal = {Phys. Rev. Lett.},
  volume = {117},
  issue = {22},
  pages = {220402},
  numpages = {6},
  year = {2016},
  month = {Nov},
  publisher = {American Physical Society},
  doi = {10.1103/PhysRevLett.117.220402}
}
@article{pAci15,
title = "A {C}ombinatorial {A}pproach to {N}onlocality and {C}ontextuality",
author = "Ac\'{i}n, A. and Fritz, T. and Leverrier, A. and Sainz, A. B.",
journal = "Communications in Mathematical Physics",
volume = {334},
issue = {2},
pages = {533-628},
year = "2015",
doi  ={10.1007/s00220-014-2260-1}
}
%hay otro que empieza con Han
@article{pHan19e,
title = "Counterfactuality, {D}efiniteness, and {B}ell's {T}heorem",
keywords = "quant-ph, physics.hist-ph",
author = "Hance, {Jonte R.}",
note = "8 pages, no figures",
year = "2019",
month = sep,
day = "14",
language = "English",
journal = "arXiv:1909.06608 [quant-ph]"
publisher = "Cornell University",
}
@article{pOak20,
AUTHOR={Oaknin, David H.},
TITLE={The {B}ell {T}heorem {R}evisited: {G}eometric {P}hases in {G}auge {T}heories},
JOURNAL={Frontiers in Physics},
VOLUME={8},
PAGES={142},
YEAR={2020},
URL={https://www.frontiersin.org/article/10.3389/fphy.2020.00142},
DOI={10.3389/fphy.2020.00142},
ISSN={2296-424X},
URL={https://www.frontiersin.org/article/10.3389/fphy.2020.00142},
DOI={10.3389/fphy.2020.00142}
}
@article{pHoo21,
  title = {Fast {V}acuum {F}luctuations and the {E}mergence of {Q}uantum {M}echanics},
  author = {'t Hooft, Gerard},
  journal = {Foundations of Physics},
  volume = {51},
  issue = {3},
  pages = {},
  numpages = {},
  year = {2021},
  month = {May},
  publisher = {},
  doi = {10.1007/s10701-021-00464-7},
  url = {https://doi.org/10.1007/s10701-021-00464-7}
}
@article{pHoo21a,
title = "An unorthodox view on quantum mechanics",
keywords = "quant-ph",
author = "t' Hoof, Gerard",
year = "2021",
month = Abr,
day = "7",
language = "English",
journal = "arXiv:2101.03179 [quant-ph]",
publisher = "Cornell University"
%note = "9 pages, no figures",
}
@article{pJar84,
 author = {Jon P. Jarrett},
 journal = {No\^{u}s},
 number = {4},
 pages = {569--589},
 publisher = {Wiley},
 title = {On the {P}hysical {S}ignificance of the {L}ocality {C}onditions in the {B}ell {A}rguments},
 volume = {18},
 year = {1984},
 doi  ={10.2307/2214878}
}
@article{pCab21,
  title = {Bell {N}on-locality and {K}ochen-{S}pecker {C}ontextuality: {H}ow are {T}hey {C}onnected?},
  author = {Cabello, A.},
  journal = {Found Phys},
  volume = {51},
  issue = {61},
  pages = {},
  numpages = {},
  year = {2021},
  month = {},
  publisher = {},
  doi={10.1007/s10701-021-00466-5}
}
@article{pBer17,
  title = {Contextuality as a Resource for Models of Quantum Computation with Qubits},
  author = {Bermejo-Vega, Juan and Delfosse, Nicolas and Browne, Dan E. and Okay, Cihan and Raussendorf, Robert},
  journal = {Phys. Rev. Lett.},
  volume = {119},
  issue = {12},
  pages = {120505},
  numpages = {5},
  year = {2017},
  month = {Sep},
  publisher = {American Physical Society}
}
@article{pHow14,
  title = {Contextuality supplies the "magic" for quantum computation},
  author = {Howard, Mark and Wallman, Joel and Veitch, Victor and Emerson, Joseph},
  journal = {Nature},
  volume = {510},
  issue = {7505},
  pages = {351--355},
  numpages = {},
  year = {2014},
  month = {Jun},
  publisher = {}
}
@article{pRau13,
  title = {Contextuality in measurement-based quantum computation},
  author = {Raussendorf, Robert},
  journal = {Phys. Rev. A},
  volume = {88},
  issue = {2},
  pages = {022322},
  numpages = {7},
  year = {2013},
  month = {Aug},
  publisher = {American Physical Society}
}
@inbook{bAde01,
author = { Guillaume   Adenier},
chapter = {Refutation of {B}ell's {T}heorem},
booktitle = {Foundations of Probability and Physics},
pages = {29--38},
publisher={World Scientific},
year    = {2001},
doi = {10.1142/9789812810809_0002}
}
@inbook{bSak11,
  title   = "Modern {Q}uantum {M}echanics",
  pages   = "32--33",
  year    = "2011",
  chapter = "Fundamental Concepts",
  doi     = "",
  publisher="Addison-Wesley",
  address  ="Ssan Francisco, USA",
  author  = "Sakurai, J.J. and Napolitano, J."
}
@article{pMuc21,
	year = 2021,
	month = {may},
	publisher = {{IOP} Publishing},
	volume = {134},
	number = {1},
	pages = {10004},
	author = {Eugen Muchowski},
	title = {On a contextual model refuting {B}ell's theorem},
	journal = {{EPL} (Europhysics Letters)}
	doi = {10.1209/0295-5075/134/10004}
%	url = {https://doi.org/10.1209/0295-5075/134/10004},
}
@article{pMuc21a,
	year = 2021,
	month = {jun},
	publisher = {{IOP} Publishing},
	volume = {134},
	number = {5},
	pages = {50002},
	author = {Eugen Muchowski},
	title = {Reply to the {C}omment by {J}usto {P}astor {L}ambare},
	doi = {10.1209/0295-5075/ac0fb4},
%	url = {https://doi.org/10.1209/0295-5075/ac0fb4}
}
@article{pKS67,
 author = {Kochen, S and Specker, E. P. },
 journal = {Journal of Mathematics and Mechanics},
 number = {1},
 pages = {59--87},
 publisher = {Indiana University Mathematics Department},
 title = {The Problem of Hidden Variables in Quantum Mechanics},
 volume = {17},
 year = {1967}
% ISSN = {00959057, 19435274},
% URL = {http://www.jstor.org/stable/24902153},
}
@article{pGra01,
  title = {Count them all},
  author = {Grangier, Philippe},
  journal = {Nature},
  volume = {409},
  issue = {6822},
  pages = {062314},
  numpages = {774--775},
  year = {2001},
  month = {Feb},
  publisher = {},
  doi = {10.1038/35057415},
  url = {https://doi.org/10.1038/35057415}
}
@article{pDeg05,
  title = {Simulating quantum correlations as a distributed sampling problem},
  author = {Degorre, Julien and Laplante, Sophie and Roland, J\'er\'emie},
  journal = {Phys. Rev. A},
  volume = {72},
  issue = {6},
  pages = {062314},
  numpages = {9},
  year = {2005},
  month = {Dec},
  publisher = {American Physical Society},
  doi = {10.1103/PhysRevA.72.062314},
  url = {https://link.aps.org/doi/10.1103/PhysRevA.72.062314}
}
@article{pGis12,
    author = {Gisin, Nicolas},
    title = "{Non-realism: {D}eep {T}hought or a {S}oft {O}ption?}",
    journal = {Foundations of Physics},
    volume = {42},
    number = {},
    pages = {80--85},
    year = {2012},
    month = {01},
    doi = {10.1007/s10701-010-9508-1},
}
@article{pFen13,
    author = {Fenton-Glynn, Luke and Kroedel, Thomas},
    title = "{{R}elativity, {Q}uantum {E}ntanglement, {C}ounterfactuals, and {C}ausation}",
    journal = {The British Journal for the Philosophy of Science},
    volume = {66},
    number = {1},
    pages = {45-67},
    year = {2013},
    month = {10},
    issn = {0007-0882},
    doi = {10.1093/bjps/axt040}
}
@article{pGHZ90,
author = {Greenberger,Daniel M.  and Horne,Michael A.  and Shimony,Abner  and Zeilinger,Anton },
title = {Bell's theorem without inequalities},
journal = {American Journal of Physics},
volume = {58},
number = {12},
pages = {1131-1143},
year = {1990},
doi = {10.1119/1.16243},
}
@article{pWha20,
  title = {Colloquium: Bell's theorem and locally mediated reformulations of quantum mechanics},
  author = {Wharton, K. B. and Argaman, N.},
  journal = {Rev. Mod. Phys.},
  volume = {92},
  issue = {2},
  pages = {021002},
  numpages = {23},
  year = {2020},
  month = {May},
  publisher = {American Physical Society},
  doi = {10.1103/RevModPhys.92.021002},
  url = {https://link.aps.org/doi/10.1103/RevModPhys.92.021002}
}
@article{pCet20,
  title = {On the {S}pin {P}rojection {O}perator and the {P}robabilistic {M}eaning of the {B}ipartite {C}orrelation {F}unction},
  author = {Cetto, A. M. and Vald\'{e}s-Hern\'{a}ndez A. and de la Pe\~{n}a, L.},
  journal = {Found Phys},
  volume = {50},
  issue = {},
  pages = {27-39},
  numpages = {},
  year = {2020},
  month = {},
  url={},
  publisher = {Springer Nature}
}
%
@book {bAlb94,
      title = "Quantum mechanics and experience",
      author = "Albert, Dabid Z.",
      year = "1994",
      publisher = "Haravard University Press",
      address = "",
      isbn = "0-674-74112-9",
      pages = "",
      url = "https://www.degruyter.com/view/title/303079"
}
%
@article{pAsp15,
  title = {Closing the {D}oor on {E}instein and {B}ohr's {Q}uatum {D}ebate},
  author = {Aspect, Alain},
  journal = {Physics},
  volume = {8},
  issue = {},
  pages = {123},
  numpages = {},
  year = {2015},
  month = {Dec},
  url={},
  publisher = {American Physical Society}
}
%
@article{pCla74,
  title = {Experimental consequences of objective local theories},
  author = {Clauser, John. F. and Horne, Michael A. },
  journal = {Phys. Rev. D},
  volume = {10},
  issue = {2},
  pages = {526-535},
  numpages = {},
  year = {1974},
  month = {Jul},
  url={},
  publisher = {American Physical Society}
}
%
@article{pCla78,
  title = {Bell's theorem: experimental tests and implications},
  author = {Clauser, John. F. and Shimony, Abner},
  journal = {Rep. Prog. Phys.},
  volume = {41},
  issue = {},
  pages = {1881},
  numpages = {},
  year = {1978},
  month = {},
  url={},
  publisher = {The institute of Physics}
}
%
@article{pMar19,
  title = {The Notion of Locality in Relational Quantum Mechanics},
  author = {Martin-Dussaud, P. and Rovelli, C. and Zalamea, F.},
  journal = {Foundations of Physics},
  volume = {49},
  issue = {},
  pages = {96--106},
  numpages = {},
  year = {2019},
  month = {},
  url={},
  publisher = {Springer Nature}
}
%
@article{pHof12,
  title = {Noncommuting local common causes for correlations violating the {C}lauser-{H}orne inequality},
  author = {Hofer-Szabo, G. and Vecsernyes, P.},
  journal = {JOURNAL OF MATHEMCATICAL PHYSICS},
  volume = {53},
  issue = {},
  pages = {122301},
  numpages = {},
  year = {2012},
  month = {},
  url={},
  publisher = {American Institute of Physics}
}
@article{pHof13,
  title = {Bell inequality and common causal explanation in algebraic quantum field theory},
  author = {Hofer-Szabo, G. and Vecsernyes, P.},
  journal = {Studies in History and Philosophy of Modern Physics},
  volume = {44},
  issue = {},
  pages = {404--416},
  numpages = {},
  year = {2013},
  month = {},
  url={},
  publisher = {American Institute of Physics}
}
@article{pSza94,
  title = {On the real meaning of {B}ell's theorem},
  author = {Szab\'{o}, L\'{a}szl\'{o} E.},
  journal = {International Journal of Theoretical Physics},
  volume = {33},
  issue = {1},
  pages = {191--197},
  numpages = {},
  year = {1994},
  month = {},
  doi   ={10.1007/BF00671624}
}
@inbook {bCla03,
      title = "John F. Clauser.: Early History of Bell's Theorem. In: Bigelow et al.(eds.) Coherence and Quantum Optics VIII",
      year = "2003",
      publisher = "Kluwer Academic/Plenum Publishers",
      address = "",
      isbn = "",
      pages="19--43",
      url = ""
}
%
@inbook {bHof72,
      title = "Albert Einstein Creator and Rebel",
      author = "Hoffmann, B. and Dukas, H.",
      chapter="The Batle and the Bomb",
      year = "1972",
      publisher = "Penguin Books Ltd.",
      address = "Harmondsworth, Middlesex, England",
      isbn = "",
      pages = "",
      url = ""
}
%
@article{pGol11,
  title = {Bell's theorem},
  author = {Goldstein, S. and Norsen, T. and Tausk, D. and Zanghi, N.},
  journal = {Scholarpedia},
  volume = {6},
  issue = {10},
  pages = {8378},
  numpages = {},
  year = {2011},
  month = {},
  doi={10.4249/scholarpedia.8378},
  publisher = {}
}
%
@article{pHow85,
title = {Einstein on locality and separability},
journal = {Studies in History and Philosophy of Science Part A},
volume = {16},
number = {3},
pages = {171--201},
year = {1985},
issn = {0039-3681},
doi = {https://doi.org/10.1016/0039-3681(85)90001-9},
author = {Don Howard}
}
@article{pHow07,
  title = {Revisiting the {E}instein {B}ohr dialogue},
  author = {Howard, D.},
  journal = {Iyyun: Jerus. Philos. Q.},
  volume = {56},
  issue = {},
  pages = {57--90},
  numpages = {},
  year = {2007},
  month = {},
  url={},
  publisher = {}
}
%
@article{pFra82,
  title = {The {C}harybdis of realism: epistemological implications of {B}ell's inequality},
  author = {Van Fraassen, B. C.},
  journal = {Synthese},
  volume = {52},
  issue = {},
  pages = {25--38},
  numpages = {},
  year = {1982},
  month = {},
  doi   ={10.1007/BF00485253},
  publisher = {}
}
%
@article{pCav14,
  title = {On modifications of {R}eichenbach's principle of common cause in light of {B}ell's theorem},
  author = {Cavalcanti, Eric G. and Lal, Raymond},
  journal = {Journal of Physics A: Mathematical and Theoretical},
  volume = {47},
  issue = {},
  pages = {424018},
  numpages = {},
  year = {2014},
  month = {},
  url={},
  publisher = {{IOP} {P}ublishing}
}
%
@article{pWig70,
  title = {On {H}idden {V}ariables and {Q}uantum {M}echanical {P}robabilities},
  author = {Wigner, Eugene P.},
  journal = {American Journal of Physics},
  volume = {38},
  issue = {},
  pages = {1005},
  numpages = {},
  year = {1970},
  month = {},
  url={http://dx.doi.org/10.1119/1.1976526},
  publisher = {American Association of Physics Teachers}
}
%
@article{pCza20,
  title = {A {L}oophole of {A}ll ``{L}oophole-{F}ree'' {B}ell-{T}ype {T}heorems},
  author = {Czachor, Marek},
  journal = {Foundations of Science},
  volume = {25},
  issue = {},
  pages = {971--985},
  numpages = {},
  year = {2020},
  month = {},
  doi={10.1007/s10699-020-09666-0},
  publisher = {}
}
%
@book {bBig13,
      title = "Non-locality and Possible World",
      author = "Tomasz F. Bigaj",
      year = "2013",
      publisher = "De Gruyter",
      address = "Berlin, Boston",
      isbn = "978-3-11-032330-6",
      pages=      "",
      url = "https://www.degruyter.com/view/title/303079"
}
%
@article{pSve88,
  title = {Do the {B}ell {I}nequalities {R}equire the {E}xistence of {J}oint {P}robability {D}istributions?},
  author = {Svetlichny, George and Redhaed, Michael and Brown, Harvey and Butterfield, Jeremy},
  journal = {Philosphy of Science},
  volume = {55},
  issue = {},
  pages = {387--401},
  numpages = {},
  year = {1988},
  month = {},
  publisher = {the Philosphy of Science Association}
}
@article{pGri11,
author = {Griffiths,Robert B. },
title = {{EPR}, {B}ell, and quantum locality},
journal = {American Journal of Physics},
volume = {79},
number = {9},
pages = {954--965},
year = {2011},
doi = {10.1119/1.3606371}
}
@article{pGri12,
  title = {Quantum Counterfactuals and Locality},
  author = {Griffiths, Robert},
  journal = {Foundations of Physics},
  volume = {42},
  issue = {},
  pages = {674--684},
  numpages = {},
  year = {2012},
  month = {},
  publisher = {Springer Science+Business Media, LLC 2012}
}
@article{pGri20,
  title = {Nonlocality claims are inconsistent with {H}ilbert-space quantum mechanics},
  author = {Griffiths, Robert},
  journal = {Physical Review A},
  volume = {101},
  issue = {},
  pages = {022117},
  numpages = {},
  year = {2020},
  month = {},
  publisher = {American Physical Society},
  doi       ={10.1103/PhysRevA.101.022117}
}
@article{pGri21,
  title = {Reply to ``{C}omment on `{N}onlocality claims are inconsistent with {H}ilbert-space quantum mechanics' ''},
  author = {Griffiths, Robert B.},
  journal = {Phys. Rev. A},
  volume = {104},
  issue = {6},
  pages = {066202},
  numpages = {4},
  year = {2021},
  month = {Dec},
  publisher = {American Physical Society},
  doi = {10.1103/PhysRevA.104.066202},
  url = {https://link.aps.org/doi/10.1103/PhysRevA.104.066202}
}
%
@article{pDic93,
  title = {Stapp's {T}heorem {W}ithout {C}ounterfactual {C}ommitments: {W}hy {I}t {F}ails {N}onetheless},
  author = {Dickson, Michael},
  journal = {Stud. Hist. Phil. Sci.},
  volume = {24},
  issue = {5},
  pages = {791--814},
  numpages = {},
  year = {1993},
  month = {},
  publisher = {Elsevier Science Ltd.}
}
%
@article{pBig10,
  title = {How to(properly) strengthen {B}ell's theorem using counterfactuals},
  author = {Bigaj, Tomasz},
  journal = {Studies in History and Philosophy of Modern Physics},
  volume = {41},
  issue = {1},
  pages = {58--66},
  numpages = {},
  year = {2010},
  month = {January},
  publisher = {Elsevier Ltd.}
}
%
@article{pUnr99b,
  title = {Reply to ``{C}omment on ``{N}onlocality counterfactuals, and quantum mechanics'' ''},
  author = {Unruh, W.},
  journal = {Physical Review A},
  volume = {60},
  issue = {3},
  pages = {2599--2600},
  numpages = {},
  year = {1999},
  month = {September},
  publisher = {The American Physical Society}
}
%
@article{pUnr99a,
  title = {Nonlocality, counterfactuals, and quantum mechanics},
  author = {Unruh, W.},
  journal = {Physical Review A},
  volume = {59},
  issue = {1},
  pages = {126--130},
  numpages = {},
  year = {1999},
  month = {January},
  publisher = {The American Physical Society}
}
@article{pSta04,
author = {Stapp,Henry P. },
title = {A {B}ell-type theorem without hidden variables},
journal = {American Journal of Physics},
volume = {72},
number = {1},
pages = {30--33},
year = {2004},
doi = {10.1119/1.1613273}
}
@article{pSta01,
  title = {Response to {C}omment on {N}onlocal character of quantum theory, by {A}bner {S}himony and {H}oward {S}tein {A}m. {J}. {P}hys. 69 (8), (2001)},
  author = {Stapp, Henry P.},
  journal = {American Journal of Physics},
  volume = {69},
  issue = {8},
  pages = {854--926},
  numpages = {},
  year = {2001},
  month = {August},
  publisher = {American Association of Physics Teachers}
}
%
@article{pSta99,
  title = {Comment on ``{N}onlocality, counterfactuals, and quantum mechanics''},
  author = {Stapp, Henry P.},
  journal = {Physical Review A},
  volume = {60},
  issue = {3},
  pages = {2595--2598},
  numpages = {},
  year = {1999},
  month = {September},
  publisher = {The American Physical Society}
}
%
@article{pSta98,
  title = {Meaning of counterfactual statements in quantum physics},
  author = {Stapp, Henry P.},
  journal = {Am. J. Phys.},
  volume = {66},
  issue = {19},
  pages = {924},
  numpages = {},
  year = {1998},
  month = {October},
  publisher = {American Association of Physics Teachers}
}
@article{pSta97,
author = {Stapp,Henry P. },
title = {Nonlocal character of quantum theory},
journal = {American Journal of Physics},
volume = {65},
number = {4},
pages = {300-304},
year = {1997},
doi = {10.1119/1.18511}
}
%
@article{pSta94,
	author = {H. P. Stapp},
	title = {Comments on ``{I}nterpretations of quantum mechanics, joint measurement of incompatible observables, and counterfactual definiteness''},
	journal = {Foundations of Physics},
	year = 1994,
	month = {dec},
	publisher = {Kluwer Academic Publishers-Plenum Publishers},
	volume = {24},
	number = {12},
	pages = {1665--1669},
	doi = {10.1007/BF02054788},
	url = {https://doi.org/10.1007/BF02054788},
}
@article{pSta71,
  title   = "S-Matrix Interpretation of Quantum Theory",
  journal = "Phys. Rev. D",
  volume  = "6 B",
  number  = "",
  pages   = "1303--1320",
  year    = "1971",
  doi     = "",
  author  = "H. P. Stapp"
}
%@article{pSHC76, SE CAMBI� A pBSHC85
%  title = {Comment on ``{T}he {T}heory of {L}ocal {B}eables''},
%  author = {A. Shimony, M. A. Horne and J. F. Clauser},
%  journal = {Epistemological Letters},
%  volume = {},
%  issue = {},
%  pages = {},
%  numpages = {},
%  year = {1976},
%  month = {October},
%}
@article{pShi84,
  title   = "Contextual Hidden Varibles Theories and {B}ell's Inequalities",
  journal = "Brit. J. Phil. Sci.",
  volume  = "35",
  number  = "",
  pages   = "25--45",
  year    = "1984",
  URL     = "https://www.jstor.org/stable/687555",
  author  = "A. Shimony"
}
@article{bShi84,
  title={Controllable and uncontrollable non-locality},
  author={Shimony, Abner and others},
  journal={Foundations of quantum mechanics in the light of new technology},
  pages={225--230},
  year={1984},
  publisher={The Physical Society of Japan Tokio}
}
@inbook{bShi93,
author={Shimony, Abner},
title={Controllable and uncontrollable non-locality},
booktitle={The Search for a Naturalistic World View},
year={1993},
publisher={Cambridge University Press},
address={Cambrige},
pages={130--139},
volume={2},
doi={10.1017/CBO9781139172196.010}
}
%
@article{pShi01,
  title = {Comment on ``{N}onlocal character of quantum theory,'' by {H}enry {P}. {S}tapp[{A}m. {J}. {P}hys. 65 (4), 300--304 (1997)]},
  author = {Shimony, Abner and Stein, Howard},
  journal = {Am. J. Phys.},
  volume = {69},
  issue = {8},
  pages = {848},
  numpages = {},
  year = {2001},
  month = {Ougust},
  publisher = {American Association of Physics Teachers}
}
@article{pMer80,
  title = {Quantum mechanics vs local realism near the classical limit: {A} {B}ell inequality for spin s},
  author = {Mermin, David N.},
  journal = {Physical Review D},
  volume = {22},
  issue = {2},
  pages = {356--361},
  numpages = {},
  year = {1980},
  month = {July},
  publisher = {The American Physical Society}
}
@article{pMer93,
  title = {Hidden variables and the two theorems of {J}ohn {B}ell},
  author = {Mermin, N. David},
  journal = {Rev. Mod. Phys.},
  volume = {65},
  issue = {3},
  pages = {803--815},
  numpages = {0},
  year = {1993},
  month = {Jul},
  publisher = {American Physical Society},
  doi = {10.1103/RevModPhys.65.803}
%  url = {https://link.aps.org/doi/10.1103/RevModPhys.65.803}
}
@article{pMer98,
  title = {Nonlocal character of quantum theory?},
  author = {Mermin, David N.},
  journal = {Am. J. Phys.},
  volume = {66},
  issue = {10},
  pages = {920},
  numpages = {},
  year = {1998},
  month = {October},
  publisher = {American Association of Physics Teachers}
}
%
@article{pMer18,
  title = {Homer {N}odded: {V}on {N}eumann's {S}urprising {O}versight},
  author = {Mermin, David N. and Schack, R.},
  journal = {Found Phys},
  volume = {48},
  issue = {},
  pages = {1007--1020},
  numpages = {},
  year = {2018},
  month = {May},
  publisher = {Springer Nature}
}
%
@article{pCli90,
  title = {Nonlocal Influences and Possible Worlds-A {S}tapp in the Wrong Direction},
  author = {Clifton, Rorbert K. and Butterfield, Jeremy N., and Readhead, Michael L. G.},
  journal = {Brit. J. Phil. Sci.},
  volume = {41},
  issue = {1},
  pages = {5--58},
  numpages = {59},
  year = {1990},
  month = {March},
  publisher = {The British Society for the Philosophy of Science}
}
%
%  author = {Handsteiner, Johannes and Friedman, Andrew S. and Rauch, Dominik and Gallicchio, Jason and Liu, Bo and Hosp, Hannes and Kofler, Johannes and Bricher, David and Fink, Matthias and Leung, Calvin and Mark, Anthony and Nguyen, Hien T. and Sanders, Isabella and Steinlechner, Fabian and Ursin, Rupert and Wengerowsky, S\"oren and Guth, Alan H. and Kaiser, David I. and Scheidl, Thomas and Zeilinger, Anton},
@article{pHan17,
  title = {Cosmic {B}ell Test: Measurement Settings from Milky Way Stars},
  author = {Handsteiner, Johannes and et al.},
  journal = {Phys. Rev. Lett.},
  volume = {118},
  issue = {6},
  pages = {060401},
  numpages = {8},
  year = {2017},
  month = {Feb},
  publisher = {American Physical Society},
  doi = {10.1103/PhysRevLett.118.060401},
  url = {https://link.aps.org/doi/10.1103/PhysRevLett.118.060401}
}
%
@article{pAbe18,
  title = {Challenging local realism with human choices},
  author = {Abellan, C. and Acin, A. and Alarcon, A. and et al.},
  journal = {Nature},
  volume = {557},
  issue = {},
  pages = {212--216},
  numpages = {},
  year = {2018},
  month = {May},
  publisher = {},
  doi = {https://doi.org/10.1038/s41586-018-0085-3},
}
%
@article{pKim19,
  title = {Tightest conditions for violating the {B}ell inequality when measurement independence is relaxed},
  author = {Kim, Minsu and Lee, Jinhyoung and Kim, Ho-Joon and Kim, Sang Wook},
  journal = {Phys. Rev. A},
  volume = {100},
  issue = {2},
  pages = {022128},
  numpages = {6},
  year = {2019},
  month = {Aug},
  publisher = {American Physical Society},
  doi = {10.1103/PhysRevA.100.022128},
  url = {https://link.aps.org/doi/10.1103/PhysRevA.100.022128}
}
%
@article{pFri19,
  title = {Relaxed {B}ell inequalities with arbitrary measurement dependence for each observer},
  author = {Friedman, Andrew S. and Guth, Alan H. and Hall, Michael J. W. and Kaiser, David I. and Gallicchio, Jason},
  journal = {Phys. Rev. A},
  volume = {99},
  issue = {1},
  pages = {012121},
  numpages = {23},
  year = {2019},
  month = {Jan},
  publisher = {American Physical Society},
  doi = {10.1103/PhysRevA.99.012121},
  url = {https://link.aps.org/doi/10.1103/PhysRevA.99.012121}
}
@Inbook{bHal16,
author="Hall, Michael J. W.",
editor="Asselmeyer-Maluga, Torsten",
title="The Significance of Measurement Independence for Bell Inequalities and Locality",
bookTitle="At the Frontier of Spacetime: Scalar-Tensor Theory, Bells Inequality, Machs Principle, Exotic Smoothness",
year="2016",
publisher="Springer International Publishing",
address="Cham",
pages="189--204",
isbn="978-3-319-31299-6",
doi="10.1007/978-3-319-31299-6_11"
}
@article{pHal11,
  title = {Relaxed {B}ell inequalities and {K}ochen-{S}pecker theorems},
  author = {Hall, Michael J. W.},
  journal = {Phys. Rev. A},
  volume = {84},
  issue = {2},
  pages = {022102},
  numpages = {},
  year = {2011},
  month = {Aug},
  publisher = {American Physical Society},
  doi = {10.1103/PhysRevA.84.022102},
  url = {https://link.aps.org/doi/10.1103/PhysRevA.84.022102}
}
%
@article{pHal10,
  title = {Local Deterministic Model of Singlet State Correlations Based on Relaxing Measurement Independence},
  author = {Hall, Michael J. W.},
  journal = {Phys. Rev. Lett.},
  volume = {105},
  issue = {25},
  pages = {250404},
  numpages = {4},
  year = {2010},
  month = {Dec},
  publisher = {American Physical Society},
  doi = {10.1103/PhysRevLett.105.250404},
  url = {https://link.aps.org/doi/10.1103/PhysRevLett.105.250404}
}
@article{pHal20,
  title   = "Does locality plus perfect correlation imply determinism?",
  journal = "arXiv:2009.14223",
  volume  = "",
  number  = "",
  pages   = "",
  year    = "2020",
  doi     = "",
  author = {Hall, Michael J. W.}
}
@inbook{bLal12,
  title   = "Do We Really Understand Quantum Mechanics?",
  pages   = "58--59",
  year    = "2012",
  chapter = "Bell theorem",
  doi     = "",
  publisher="Cambridge University Press",
  author  = {F. Lalo\"{e}}
}
%
@article{pFel95,
	title = {New loophole for the {E}instein-{P}odolsky-{R}osen paradox},
	author = {Feldmann, Michel},
	journal = {Foundations of Physics Letters},
	year = 1995,
	volume = {8},
	number = {1},
	pages = {41--53},
	doi   = {10.1007/BF02187530}
}
%
%
@article{pSica17,
	title = {The ultimate loophole in {B}ell's theorem: The inequality is identically satisfied by data sets composed of $\pm1$ assuming merely that they exist},
	author = {L. Sica},
	journal = {Open Physics},
	year = 2017,
	volume = {15},
	number = {},
	pages = {577--585},
	url = {https://www.degruyter.com/view/j/phys.2017.15.issue-1/phys-2017-0066/phys-2017-0066.xml}
}
%
@article{pHeu19,
	doi = {10.1140/epjst/e2019-800216-2},
	url = {https://doi.org/10.1140/epjst/e2019-800216-2},
	year = 2019,
	month = {march},
	publisher = {Springer Berlin Heidelberg},
	volume = {227},
	number = {},
	pages = {2209�-2219},
	author = {E. F. G. van {He}usden and T. M. Nieuwenhuizen},
	title = {Simultaneous measurement of non-commuting observables in entangled systems},
	journal = {The European Physical Journal Special Topics},
}
%
@article{pLar14,
	doi = {10.1088/1751-8113/47/42/424003},
	url = {https://doi.org/10.1088%2F1751-8113%2F47%2F42%2F424003},
	year = 2014,
	month = {oct},
	publisher = {{IOP} Publishing},
	volume = {47},
	number = {42},
	pages = {424003},
	author = {Jan-{\AA}ke Larsson},
	title = {Loopholes in {B}ell inequality tests of local realism},
	journal = {Journal of Physics A: Mathematical and Theoretical},
}
@article{pJCh18,
  title   = "Quantum correlations are weaved by the spinors of the {E}uclidean primitives",
  journal = "R. Soc open sci.",
  volume  = "5",
  number  = "",
  pages   = "180526",
  year    = "2018",
  doi     = "",
  author  = "J. Christian"
}
@article{pJCh19,
author={J. Christian},
journal={IEEE Access},
title={Bell's {T}heorem Versus {L}ocal {R}ealism in a {Q}uaternionic {M}odel of {P}hysical {S}pace},
year={2019},
volume={7},
number={},
pages={133388-133409},
doi={10.1109/ACCESS.2019.2941275},
ISSN={},
month={},
}
@article{pJCh20,
  title   = "Oversights in the {R}espective {T}heorems of {V}on {N}eumann and {B}ell are {H}omologous",
  journal = "arXiv:1704.02876v14",
  volume  = "",
  number  = "",
  pages   = "",
  year    = "2020",
  doi     = "",
  author  = "J. Christian"
}
%
@article{pHen15,
  title   = "Loophole-free {B}ell Inequality Violation Using Electron Spins Separated by 1.3 Kilometers",
  journal = "Nature",
  volume  = "526",
  number  = "",
  pages   = "682--686",
  year    = "2015",
  doi     = "",
  author  = "B. Hensen et al."
}
%
@article{pGiu15,
  title   = "Significant-Loophole-Free Test of {B}ell's Theorem with Entangled Photons",
  journal = "Phys. Rev. Lett.",
  volume  = "115",
  number  = "",
  pages   = "250401",
  year    = "2015",
  doi     = "",
  author  = "M. Giustina et al."
}
%
@article{pSha15,
  title   = "Strong Loophole-Free Test of Local Realism",
  journal = "Phys. Rev. Lett.",
  volume  = "115",
  number  = "",
  pages   = "250402",
  year    = "2015",
  doi     = "",
  author  = "L. K. Shalm et al."
}
%
@article{pBla10,
  title   = "The {EPR} paradox, {B}ell's inequality, and the question of locality",
  journal = "American Journal of Physics",
  volume  = "78",
  number  = "",
  pages   = "111-120",
  year    = "2010",
  doi     = "10.1119/1.3243279",
  author  = "G. Blaylock"
}
%
@article{pFor86,
  title   = "Counterfactual Reasoning in the {Bell-EPR} Paradox",
  journal = "Philosophy of Science",
  volume  = "53",
  number  = "",
  pages   = "133-144",
  year    = "1986",
  doi     = "10.1086/289299",
  author  = "M. R. Forster"
}
%
@article{pWol15,
  title   = "Nonlocality without counterfactual reasoning",
  journal = "Phys. Rev. A",
  volume  = "92",
  number  = "",
  pages   = "052102",
  year    = "2015",
  doi     = "10.1103/PhysRevA.92.052102",
  author  = "S. Wolf"
}
%
@article{pHeb78,
  title   = "Generalization of {B}ell's {T}heorem",
  journal = "Found. Phys.",
  volume  = "8",
  number  = "",
  pages   = "313--317",
  year    = "1978",
  doi     = "10.1007/BF00715216",
  author  = "N. Herbert and Karush"
}
%
@article{pHes04,
	author = {Hess, Karl and Philipp, Walter},
	title = {Breakdown of {B}ell's theorem for certain objective local parameter spaces},
	volume = {101},
	number = {7},
	pages = {1799--1805},
	year = {2004},
	doi = {10.1073/pnas.0307479100},
	publisher = {National Academy of Sciences},
	issn = {0027-8424},
	URL = {https://www.pnas.org/content/101/7/1799},
	eprint = {https://www.pnas.org/content/101/7/1799.full.pdf},
	journal = {Proceedings of the National Academy of Sciences}
}
%
@article{pHes05,
  title   = "The {B}ell Theorem as a Special Case of a Theorem of {B}ass",
  journal = "Found. Phsy.",
  volume  = "35",
  number  = "",
  pages   = "1749--1767",
  year    = "2005",
  doi     = "",
  author  = "Hess, Karl"
}
%
@article{pHes17,
  title   = "Special {I}ssue: {E}ver {N}ew ``{L}oopholes'' in {B}ell's {A}rgument and {E}xperimental {T}ests",
  journal = "Open Physics",
  volume  = "15",
  number  = "1",
  pages   = "572--576",
  year    = "2017",
  doi     = "",
  author  = "Hess, karl"
}
%
@article{pMau10,
  title   = "What {B}ell proved: {A} reply to {B}laylock",
  journal = "American Journal of Physics",
  volume  = "78",
  number  = "",
  pages   = "121",
  year    = "2010",
  doi     = "",
  author  = "Maudlin, Tim"
}
@article{pMau11,
author = {Maudlin,Tim },
title = {How {B}ell reasoned: A reply to {G}riffiths},
journal = {American Journal of Physics},
volume = {79},
number = {9},
pages = {966-970},
year = {2011},
doi = {10.1119/1.3606476}
}
@article{pMau14,
  title   = "What {B}ell did",
  journal = "J. Phys. A",
  volume  = "47",
  number  = "",
  pages   = "424010",
  year    = "2014",
  doi     = "10.1088/1751-8113/47/42/424010",
  author  = "Maudlin, Tim"
}
%
@article{pMau14a,
  title   = "Reply to Comment on {W}hat {B}ell did",
  journal = "J. Phys. A",
  volume  = "47",
  number  = "",
  pages   = "424012",
  year    = "2014",
  doi     = "10.1088/1751-8113/47/42/424012",
  author  = "Maudlin, Tim"
}
@article{pNor07,
  title   = "Against ``Realism''",
  journal = "Found. Phys.",
  volume  = "37",
  number  = "",
  pages   = "311--454",
  year    = "2007",
  author  = "T. Norsen",
  doi     = "10.1007/s10701-007-9104-1"
}
@article{pNor11,
author = {Norsen,Travis },
title = {John {S}. {B}ell�s concept of local causality},
journal = {American Journal of Physics},
volume = {79},
number = {12},
pages = {1261-1275},
year = {2011},
doi = {10.1119/1.3630940}
}
@incollection{cLau12,
  author      = "Laudisa, F.",
  title       = "The {U}ninvited {G}uest: ``{L}ocal {R}ealism'' and the {B}ell {T}heorem",
  editor      = "de Regt H. and Hartmann S. and Okasha S.",
  booktitle   = "The European Philosophy of Science Association Proceedings, vol 1. ",
  publisher   = "Springer",
  address     = "Dordrecht",
  year        = 2012,
  pages       = "",
  chapter     = "",
  doi         ="10.1007/978-94-007-2404-4_13"
}
@article{pLau19,
  title   = "Counterfactual {R}easoning, {R}ealism and {Q}uantum {M}echanics: {M}uch {A}do {A}bout {N}othing?",
  journal = "Erkenn",
  volume  = "84",
  number  = "",
  pages   = "1103--1118",
  year    = "2019",
  doi     = "10.1007/s10670-018-9997-4",
  author  = "F. Laudisa"
}
@article{pLau18,
  title   = "Stop Making Sense of {B}ell's Theorem and Nonlocality?",
  journal = "European Journal for Philosophy of Science",
  volume  = "8",
  number  = "",
  pages   = "293--306",
  year    = "2018",
  doi     = "10.1007/s13194-017-0187-z",
  author  = "F. Laudisa"
}
%
@article{pWis06,
author = { H. M.   Wiseman },
title = {From {E}instein's theorem to {B}ell's theorem: a history of quantum non-locality},
journal = {Contemporary Physics},
volume = {47},
number = {2},
pages = {79-88},
year  = {2006},
publisher = {Taylor & Francis},
doi = {10.1080/00107510600581011}
}
@article{pWis14,
  title   = "The two {B}ell's theorems of {J}ohn {B}ell",
  journal = "J. Phys. A",
  volume  = "47",
  number  = "",
  pages   = "424001",
  year    = "2014",
  doi     = "",
  author  = "H. M. Wiseman"
}
@article{pWer14,
  title   = "Comment on ``{W}hat {B}ell did''",
  journal = "J. Phys. A",
  volume  = "47",
  number  = "",
  pages   = "424011",
  year    = "2014",
  doi     = "10.1088/1751-8113/47/42/424011",
  author  = "R. F. Werner"
}
@article{pWer14a,
  title   = "What {M}audlin replied to",
  journal = "arXiv:1411.2120 [quant-ph]",
  volume  = "",
  number  = "",
  pages   = "",
  year    = "2014",
  author  = "R. F. Werner"
}
@article{pBel64,
  title   = "On the {E}instein-{P}odolsky-{R}osen paradox",
  journal = "Physics ",
  volume  = "1",
  number  = "",
  pages   = "195--200",
  year    = "1964",
  doi     = "10.1103/PhysicsPhysiqueFizika.1.195",
  author  = "J. S. Bell"
}
%
}
@article{pBel66,
  title   = "On the problem of hidden variables in quantum mechanics",
  journal = "Reviews of Modern Physics",
  volume  = "38",
  number  = "",
  pages   = "447--452",
  year    = "1966",
  doi     = "",
  author  = "J. S. Bell"
}
%
@inbook{bBel71,
  title   = "Speakable and Unspeakable in Quantum Mechanics",
  pages   = "36--37",
  year    = "2004",
  chapter = "Introduction to the hidden variable question",
  doi     = "",
  publisher="Cambridge University Press",
  address  ="Cambridge",
  author  = "J. S. Bell",
}
@article{pBel75,
  title   = "Locality in quantum mechanics: reply to critics",
  journal = "Epistemological Letters",
  volume  = "",
  number  = "",
  pages   = "2--6",
  year    = "1975",
  month   = "November",
  doi     = "",
  author  = "J. S. Bell"
}
%@article{pBel76, %citar pBSHC85,
%  title   = "The theory of local beables",
%  journal = "Epistemological Letters",
%  volume  = "",
%  number  = "",
%  pages   = "",
%  year    = "1976",
%  month   = "March",
%  doi     = "",
%  author  = "J. S. Bell"
%}
@article{pBel77,
  title   = "Free variables and local causality",
  journal = "Epistemological Letters",
  volume  = "",
  number  = "",
  pages   = "",
  year    = "1977",
  month   = "February",
  doi     = "",
  author  = "J. S. Bell"
}
@article{pBel81,
  title   = "Bertlmann's socks and the nature of reality",
  journal = "Journal of Physque",
  volume  = "42",
  number  = "",
  pages   = "41--61",
  year    = "1981",
  doi     = "10.1051/jphyscol:1981202",
  author  = "J. S. Bell"
}
@inbook{bBel90,
author = { J. S.   Bell },
title = {La nouvelle cuisine},
booktitle = {John S Bell on the Foundations of Quantum Mechanics},
editor={Bell, M and Gottfried, K and , Veltman, M},
chapter = {},
pages = {216-234},
doi = {10.1142/9789812386540_0022}
}
@article{pBSHC85,
title = {An Exchange on Local Beables},
journal = {Dialectica},
volume = {39},
number = {2},
pages = {85-96},
doi = {10.1111/j.1746-8361.1985.tb01249.x},
year = {1985}
}
@article{pBSHC85,
 author = {J.S. Bell and A. Shimony and M.A. Horne and J.F. Clauser},
 journal = {Dialectica},
 number = {2},
 pages = {85--110},
 publisher = {Wiley},
 title = {An Exchange on Local Beables},
 volume = {39},
 year = {1985},
 ISSN = {00122017, 17468361},
 URL = {http://www.jstor.org/stable/42970534}
}
@article{mBel88,
  title   = "Interview {J}ohn {B}ell",
  journal = "Omni",
  volume  = "10",
  number  = "8",
  pages   = "84--92",
  year    = "1988",
  month   = "May",
  doi     = "",
  author  = "J. S. Bell"
}
%
@article{pBou17,
  title   = "Making Sense of {B}ell's Theorem and Quantum Nonlocality",
  journal = "Found. of Phys.",
  volume  = "47",
  number  = "",
  pages   = "640--657",
  year    = "2017",
  doi     = "10.1007/s10701-017-0083-6",
  author  = "S. Boughn"
}
%5
@article{pCHSH69,
  title   = "Proposed experiment to test local hidden-variables theories",
  journal = "Phys.Rev.Lett.",
  volume  = "23",
  number  = "15",
  pages   = "880",
  year    = "1969",
  author  = "J.F. Clauser and M.A. Horne and A. Shimony and  R.A. Holt",
  doi     = "10.1103/PhysRevLett.23.880"
}
@article{pDBa84a,
  title   = "On the significance of {B}ell's inequality for hidden-variables theories",
  journal = "Lettere Al Nuovo Cimento",
  volume  = "39",
  number  = "11",
  pages   = "234--238",
  year    = "1984",
  doi     = "",
  author  = "W. {D}e Baere"
}
@article{pDBa84b,
  title   = "On Conditional {B}ell inequalities and Quantum Mechanics",
  journal = "Nuovo Cimento",
  volume  = "40",
  number  = "",
  pages   = "488--492",
  year    = "1984",
  doi     = "",
  author  = "W. {De} Baere"
}
@article{pDBa98,
author = {De Baere, W.},
title = {On {S}ome {C}onsequences of the {B}reakdown of {C}ounterfactual {D}efiniteness in the {Q}uantum {W}orld},
journal = {Fortschritte der Physik},
volume = {46},
number = {6--8},
pages = {843--847},
doi = {https://doi.org/10.1002/(SICI)1521-3978(199811)46:6/8<843::AID-PROP843>3.0.CO;2-1},
url = {https://onlinelibrary.wiley.com/doi/abs/10.1002/%28SICI%291521-3978%28199811%2946%3A6/8%3C843%3A%3AAID-PROP843%3E3.0.CO%3B2-1},
eprint = {https://onlinelibrary.wiley.com/doi/pdf/10.1002/%28SICI%291521-3978%28199811%2946%3A6/8%3C843%3A%3AAID-PROP843%3E3.0.CO%3B2-1},
year = {1998}
}
@article{pDPCB72,
  title   = "On hidden-variable theories and {B}ell's inequality",
  journal = "Lett. Nuovo Cimento",
  volume  = "5",
  number  = "",
  pages   = "177--181",
  year    = "1972",
  doi     = "",
  author  = "L. {De La Pe\~{n}a} and A. M. Cetto and T. A. Brody"
}
%
@article{pEbe77,
  title   = "Bell's {T}heorem without {H}idden {V}ariables",
  journal = "Nuov. Cim.",
  volume  = "38 B",
  number  = "",
  pages   = "75--79",
  year    = "1977",
  doi     = "",
  author  = "P. Eberhard"
}
%
@article{pBoh35,
  title   = "Can quantum-mechanical description of physical reality be considered complete?",
  journal = "Phys.Rev.",
  volume  = "48",
  number  = "",
  pages   = "696--702",
  year    = "1935",
  doi     = "",
  author  = "Bohr, Niels"
}
%
@article{pEPR35,
  title   = "Can quantum-mechanical description of physical reality be considered complete?",
  journal = "Phys.Rev.",
  volume  = "47",
  number  = "",
  pages   = "777--780",
  year    = "1935",
  doi     ="10.1103/PhysRev.47.777"
  author  = "A. Einstein and B. Podolski  and Rosen N."
}
%10
@article{pGil14,
  title   = "Statistics, Causality and {B}ell's Theorem",
  journal = "Statistical Science",
  volume  = "29",
  number  = "4",
  pages   = "512--528",
  year    = "2014",
  doi     = "10.1214/14-STS490",
  author  = "R. D. Gill"
}
@article{pKhr07,
  title   = "Bell's inequality: Physics meets Probability",
  journal = "arXiv:0709.3909",
  volume  = "",
  number  = "",
  pages   = "",
  year    = "2007",
  doi     = "",
  author  = "Khrennikov, Andrei"
}
@article{pKhr08a,
  title   = "{E}PR-�{B}OHM {E}XPERIMENT AND {B}ELL�S {I}NEQUALITY: {Q}UANTUM {P}HYSICS {M}EETS {P}ROBABILITY {T}HEORY",
  journal = "Theoretical and Mathematical Physics",
  volume  = "157",
  number  = "1",
  pages   = "1448--1460",
  year    = "2008",
  doi     = "",
  author  = "Khrennikov, Andrei"
}
@Article{pKhr08b,
AUTHOR = {Khrennikov, Andrei},
TITLE = {Bell-{B}oole {I}nequality: {N}onlocality or {P}robabilistic {I}ncompatibility of {R}andom {V}ariables?},
JOURNAL = {Entropy},
VOLUME = {10},
YEAR = {2008},
NUMBER = {2},
PAGES = {19--32},
URL = {https://www.mdpi.com/1099-4300/10/2/19},
ISSN = {1099-4300},
DOI = {10.3390/entropy-e10020019}
}
@article{pKhr09,
  title   = "Nonlocality as well as rejection of realism are only sufficient (but non-necessary!) conditions for violation of {B}ell's inequality",
  journal = "Information Scienes",
  volume  = "179",
  number  = "5",
  pages   = "492--504",
  year    = "2009",
  doi     = "10.1016/j.ins.2008.08.021",
  author  = "Khrennikov, Andrei"
}
@article{pKhr19,
  title   = " Get {R}id of {N}onlocality from {Q}uantum {P}hysics",
  journal = "Entropy",
  volume  = "21",
  number  = "8",
  pages   = "806",
  year    = "2019",
  doi     = "10.3390/e21080806",
  author  = "Khrennikov, Andrei"
}
@article{pKhr20,
  title   = " Can There be Given Any Meaning to Contextuality Without Incompatibility?",
  journal = "Int J Theor Phys",
  volume  = "",
  number  = "",
  pages   = "",
  year    = "2020",
  doi     = " https://doi.org/10.1007/s10773-020-04666-z",
  author  = "Khrennikov, Andrei"
}
@article{pKup05,
  title   = "Entanglement and {B}ell {I}nequalities",
  journal = "J Russ Laser Res",
  volume  = "26",
  number  = "",
  pages   = "514--523",
  year    = "2005",
  doi     = "10.1007/s10946-005-0048-7",
  author  = "Kupczynski, Marian"
}
@article{cKup12,
  title   = "Entanglement and quantum nonlocality demystified",
  journal = "AIP Conf. Proc.",
  volume  = "",
  number  = "1508",
  pages   = "253",
  year    = "2012",
  doi     = "doi.org/10.1063/1.4773137",
  author  = "M. Kupczynski"
}
@article{cKup14,
  title   = "Causality and local determinism versus quantum nonlocality",
  journal={Journal of Physics: Conference Series},
  volume  = "504",
  number  = "1",
  pages   = "012015",
  year    = "2014",
  doi     = "https://doi.org/10.1088/1742-6596/504/1/012015",
  author  = "Kupczynski, Marian"
}
@article{pKup15,
  title   = "Bell Inequalities, Experimental Protocols and Contextuality",
  journal = "Found. Phys.",
  volume  = "45",
  number  = "",
  pages   = "735--753",
  year    = "2015",
  doi     = "",
  author  = "Kupczynski, Marian"
}
@article{pKup17,
author = {Kupczynski, Marian},
title = {Is {E}insteinian no-signalling violated in {B}ell tests?},
journal = {Open Physics},
number = {1},
volume = {15},
year = {2017},
pages = {739--753}
}
@Article{pKup18,
AUTHOR = {Kupczynski, Marian},
TITLE = {Closing the Door on Quantum Nonlocality},
JOURNAL = {Entropy},
VOLUME = {20},
YEAR = {2018},
NUMBER = {11},
ARTICLE-NUMBER = {877},
URL = {https://www.mdpi.com/1099-4300/20/11/877},
ISSN = {1099-4300},
ABSTRACT = {Bell-type inequalities are proven using oversimplified probabilistic models and/or counterfactual definiteness (CFD). If setting-dependent variables describing measuring instruments are correctly introduced, none of these inequalities may be proven. In spite of this, a belief in a mysterious quantum nonlocality is not fading. Computer simulations of Bell tests allow people to study the different ways in which the experimental data might have been created. They also allow for the generation of various counterfactual experiments’ outcomes, such as repeated or simultaneous measurements performed in different settings on the same “photon-pair”, and so forth. They allow for the reinforcing or relaxing of CFD compliance and/or for studying the impact of various “photon identification procedures”, mimicking those used in real experiments. Data samples consistent with quantum predictions may be generated by using a specific setting-dependent identification procedure. It reflects the active role of instruments during the measurement process. Each of the setting-dependent data samples are consistent with specific setting-dependent probabilistic models which may not be deduced using non-contextual local realistic or stochastic hidden variables. In this paper, we will be discussing the results of these simulations. Since the data samples are generated in a locally causal way, these simulations provide additional strong arguments for closing the door on quantum nonlocality.},
DOI = {10.3390/e20110877}
}
@article{pKup20,
  title   = {Is the {M}oon {T}here {I}f {N}obody {L}ooks: {B}ell {I}nequalities and {P}hysical {R}eality},
  journal = {Frontiers in Physics},
  volume  = "8",
  number  = "",
  pages   = "273",
  year    = "2020",
  doi     = "10.3389/fphy.2020.00273",
  author  = "M. Kupczynski"
}
@article{pKup22,
title = "A comment on {B}ell's {T}heorem {L}ogical {C}onsistency",
keywords = "quant-ph, physics.hist-ph",
author = "Kupczynski, Marian",
note = "10 pages, 62 references",
year = "2022",
month = feb,
day = "19",
language = "English",
journal = "	arXiv:2202.09639 [quant-ph]",
publisher = "Cornell University",
doi = "10.48550/arXiv.2202.09639"
}
@article{pLam17,
  title   = "On the {CHSH} Form of {B}ell's Inequalities",
  journal = "Found. Phys.",
  volume  = "47",
  number  = "",
  pages   = "321--326",
  year    = "2017",
  doi     = "10.1007/s10701-017-0063-x",
  author  = "J. P. Lambare"
}
@article{pLam17a,
  title   = "On {N}ieuwenhuizen's treatment of contextuality in {B}ell's Theorem",
  journal = "Found. Phys.",
  volume  = "47",
  number  = "",
  pages   = "1591--1596",
  year    = "2017",
  doi     = "10.1007/s10701-017-0118-z",
  author  = "J. P. Lambare"
}
@article{pLam20,
  title   = "Comment on ``{A} {L}oophole of {A}ll ``{L}oophole-{F}ree''{B}ell-{T}ype {T}heorems''",
  journal = "Found Sci",
  volume  = "26",
  number  = "",
  pages   = "917--924",
  year    = "2021",
  doi     = "10.1007/s10699-020-09695-9",
  author  = "J. P. Lambare"
}
@article{pLam21,
  title = {Comment on ``{N}onlocality claims are inconsistent with {H}ilbert-space quantum mechanics''},
  author = {Lambare, Justo Pastor},
  journal = {Phys. Rev. A},
  volume = {104},
  issue = {6},
  pages = {066201},
  numpages = {4},
  year = {2021},
  month = {Dec},
  publisher = {American Physical Society},
  doi = {10.1103/PhysRevA.104.066201}
}
@article{pLam21a,
author = {Lambare, Justo Pastor},
title = {Bell inequalities, counterfactual definiteness and falsifiability},
journal = {International Journal of Quantum Information},
volume = {19},
number = {03},
pages = {2150018},
year = {2021},
doi = {10.1142/S0219749921500180}
}
@article{pLam21b,
  title   = "A {N}ote on {B}ell's {T}heorem {L}ogical {C}onsistency",
  journal = "Found Phys",
  volume  = "51",
  number  = "84",
  pages   = "",
  year    = "2021",
  doi     = "10.1007/s10701-021-00488-z",
  author  = "Lambare, J. P. and Franco, R."
}
@article{pLam21c,
  title   = {Comment on ``{O}n a contextual model refuting {B}ell's theorem'' by {M}uchowski {E}ugen},
  journal = {{EPL} (Europhysics Letters)},
  volume  = "134",
  number  = "5",
  pages = {50001},
  year    = 2021,
  month = {jun},
  publisher = {{IOP} Publishing},
  author  = {Lambare, J. P.}
}
@article{pLam21d,
  title   = "Comment on ``{A} {L}oophole of {A}ll ``{L}oophole-Free'' {B}ell-{T}ype {T}heorems''",
  journal = "Found Sci",
  volume  = "26",
  number  = "4",
  pages   = "917--924",
  year    = "2021",
  doi     = "https://doi.org/10.1007/s10699-020-09695-9",
  author  = "J. P. Lambare"
}
@article{pMuy86,
  title   = "THE {B}ELL {I}NEQUALITIES AND THEIR {I}RRELEVANCE TO THE {P}ROBLEM OF {L}OCALITY IN {Q}UANTUM {M}ECHANICS",
  journal = "PHYSICS LETTERS",
  volume  = "114A",
  number  = "2",
  pages   = "65--67",
  year    = "1986",
  doi     = "",
  author  = "W. M. De Muynck"
}
%
@article{pMuy94,
  title   = "Interpretations of Quantum Mechanics, Joint Measurements of Incompatible Observables, and Counterfactual Definiteness",
  journal = "Found. Phys.",
  volume  = "24",
  number  = "",
  pages   = "1589--1664",
  year    = "1994",
  doi     = "",
  author  = "W. M. Muynck and W. {De Baere} and H. Martens"
}
@inbook{bMuy02,
  title   = "Foundations of Quantum Mechanics, and Empiricist Approach",
  pages   = "471--478",
  year    = "2002",
  chapter = "The {B}ell inequality in quantum mechanics",
  doi     = "",
  publisher="Kluwer Academic Publishers",
  author  = "W. M. Muynck"
}
%
@article{pNie09,
  title = {Where {B}ell {W}ent {W}rong},
  journal = {AIP Conference Proceedings},
  volume = {1101},
  number = {1},
  pages = {127-133},
  year    = "2009",
  doi = {10.1063/1.3109932},
  author  = "Nieuwenhuizen, Th. M. ",
}
%
@article{pNie11,
  title   = "Is the Contextuality Loophole Fatal for the Derivation of {B}ell Inequalities?",
  journal = "Found. Phys.",
  volume  = "41",
  number  = "",
  pages   = "580-591",
  year    = "2011",
  doi     = "",
  author  = "Nieuwenhuizen, Th. M. "
}
%
@article{pNie17,
  title   = "The Contextuality Loophole is Fatal for the Derivation of {B}ell Inequalities: Reply to a Comment by I. Schmelzer",
  journal = "Found. Phys.",
  volume  = "47",
  number  = "",
  pages   = "316--319",
  year    = "2017",
  doi     = "https://doi.org/10.1007/s1070",
  author  = "Nieuwenhuizen, Th. M and Kupczynski, M"
}
%
@article{pPer78,
  title   = "Unperformed experiments have no results",
  journal = "American Journal of Physics",
  volume  = "46",
  number  = "",
  pages   = "745--747",
  year    = "1978",
  doi     = "10.1119/1.11393",
  author  = "A. Peres"
}
%20
@article{pSky82,
  title   = "Counterfactual Definiteness and Local Causation",
  journal = "Philosophy of Science",
  volume  = "49 B",
  number  = "",
  pages   = "43--50",
  year    = "1982",
  doi     = "10.1086/289033",
  author  = "B. Skyrms"
}
%
@inbook{bSta16,
place={Cambridge},
chapter={Strengthening Bell's Theorem: Removing the Hidden-Variable Assumption},
title={Quantum Nonlocality and Reality: 50 Years of Bell's Theorem},
publisher={Cambridge University Press},
author={Stapp, Henry P.},
editor={Bell, Mary and Gao, Shan},
year={2016},
pages={151--159}
}
%
@article{pZuk14,
  title   = "Quantum non-locality—it ain't necessarily so....",
  journal = "Phys. A: Math. Theor.",
  volume  = "47",
  number  = "",
  pages   = "424009",
  year    = "2014",
  doi     = "10.1088/1751-8113/47/42/424009",
  author  = "M. Zukowski and C. Brukner"
}
%23
@article{pDRHM11,
  title   = "Extended {B}oole-{B}ell Inequalities Applicable to Quantum Theory",
  journal = "Journal of Computational and Theoretical Nanoscience",
  volume  = "8",
  number  = "",
  pages   = "101--1039",
  year    = "2011",
  doi     = "",
  author  = "H. {De Raedt} and K. Hess and K. Michielsen"
}
%24
@article{pDRKM14,
  title   = "Quantum theory  as most robust description of reproducible experiments",
  journal = "Annals of Physics",
  volume  = "347",
  number  = "",
  pages   = "45--73",
  year    = "2014",
  doi     = "",
  author  = "H. {De Raedt} and M. I. Katsnelson and K. Michielsen"
}
@article{pFin82,
  title   = "Hidden Variables, Joint Probability, and the {B}ell Inequalities",
  journal = "Phys. Rev. Lett.",
  volume  = "48",
  number  = "",
  pages   = "291--295",
  year    = "1982",
  doi     = "",
  author  = "A. Fine"
}
@article{pSRBB88,
  title   = "Do the {B}ell inequalities require the existence of joint probability distributions",
  journal = "Philosophy os Science",
  volume  = "55",
  number  = "",
  pages   = "387--401",
  year    = "1988",
  doi     = "",
  author  = "G. Svetlichny and M. Readhead and H. Brown and J. Butterfield"
}
@inbook{bLegg87,
  title   = "The Problems of Physics",
  pages   = "164--166",
  year    = "1987",
  chapter = "Skeletons in the cupboard",
  doi     = "",
  publisher="Oxford University Press",
  author  = "A. J. Leggett"
}
